# Supplementary material
Source: Royal Society of Chemistry journal article supplement (doi:10.1039/d6tc01050d)
Supplement: d6tc01050d1.pdf [file d6tc01050d1.pdf]

Supporting information for:

### Ultra-long WSe<sub>2</sub> nanotubes and related hybrid nanostructures

Vojtech Kundrat,<sup>a,b,c,\*</sup> Vaclav Huzlik,<sup>a</sup> Stepan Kusak,<sup>a</sup> Ramon Pina Brito,<sup>d</sup> Dido Denier Van der Gon,<sup>d</sup> Stewart Robertson,<sup>e</sup> Zhaoxia Zhou,<sup>e</sup> Kristyna Bukvisova,<sup>c</sup> Lothar Houben,<sup>f</sup> Yao Guo,<sup>g</sup> Poala Ayala,<sup>d</sup> Reshef Tenne<sup>b,\*</sup>

<sup>a</sup> Department of Chemistry, Faculty of Science, Masaryk University, Kamenice 5, Brno 62500, Czechia

<sup>b</sup> Department of Molecular Chemistry and Materials Science, Weizmann Institute of Science, Herzl 234 St, Rehovot 7610001, Israel

<sup>c</sup> Thermo Fisher Scientific, Vlastimila Pecha 12, 62700 Brno, Czech Republic

<sup>d</sup> Faculty of Physics, University of Vienna, 1090 Wien, Strudlhofgasse 4

<sup>e</sup> Department of Materials, Loughborough University, Epinal Way, Leicestershire, LE11 3TU, United Kingdom

<sup>f</sup> Department of Chemical Research Support, Weizmann Institute of Science, Herzl 234 St, Rehovot 7610001, Israel

<sup>g</sup> Centre for Quantum Physics, Key Laboratory of Advanced Optoelectronic Quantum Architecture and Measurement, School of Physics, Beijing Institute of Technology, Beijing, 100081, China.

\*Corresponding authors

Email: [reshef.tenne@weizmann.ac.il](mailto:reshef.tenne@weizmann.ac.il) [vojtechkundrat@mail.muni.cz](mailto:vojtechkundrat@mail.muni.cz)

KEY WORDS: tungsten diselenide, WSe<sub>2</sub> nanotube, W<sub>18</sub>O<sub>49</sub> nanowhisiker

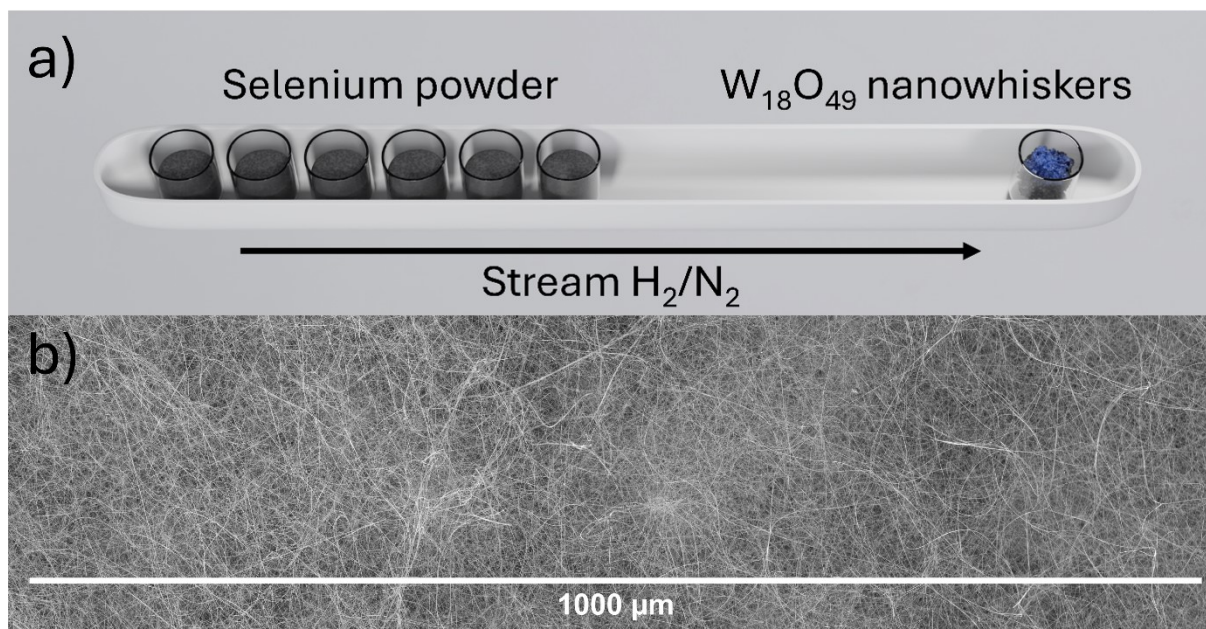

**Figure 1S.** a) Schematic rendering of the reaction modulus with multiple selenium sources placed downstream of the tungsten oxide nanowhisiker powder. The selenium crucibles were pushed gradually to the hot zone of the reactor to provide a semi-continuous flux of selenium vapor. b) low-magnified SEM image of the prepared WSe<sub>2</sub> ultralong nanotubes. The chosen scale bar is 1000 μm to demonstrate the macroscopic length of the prepared structures.

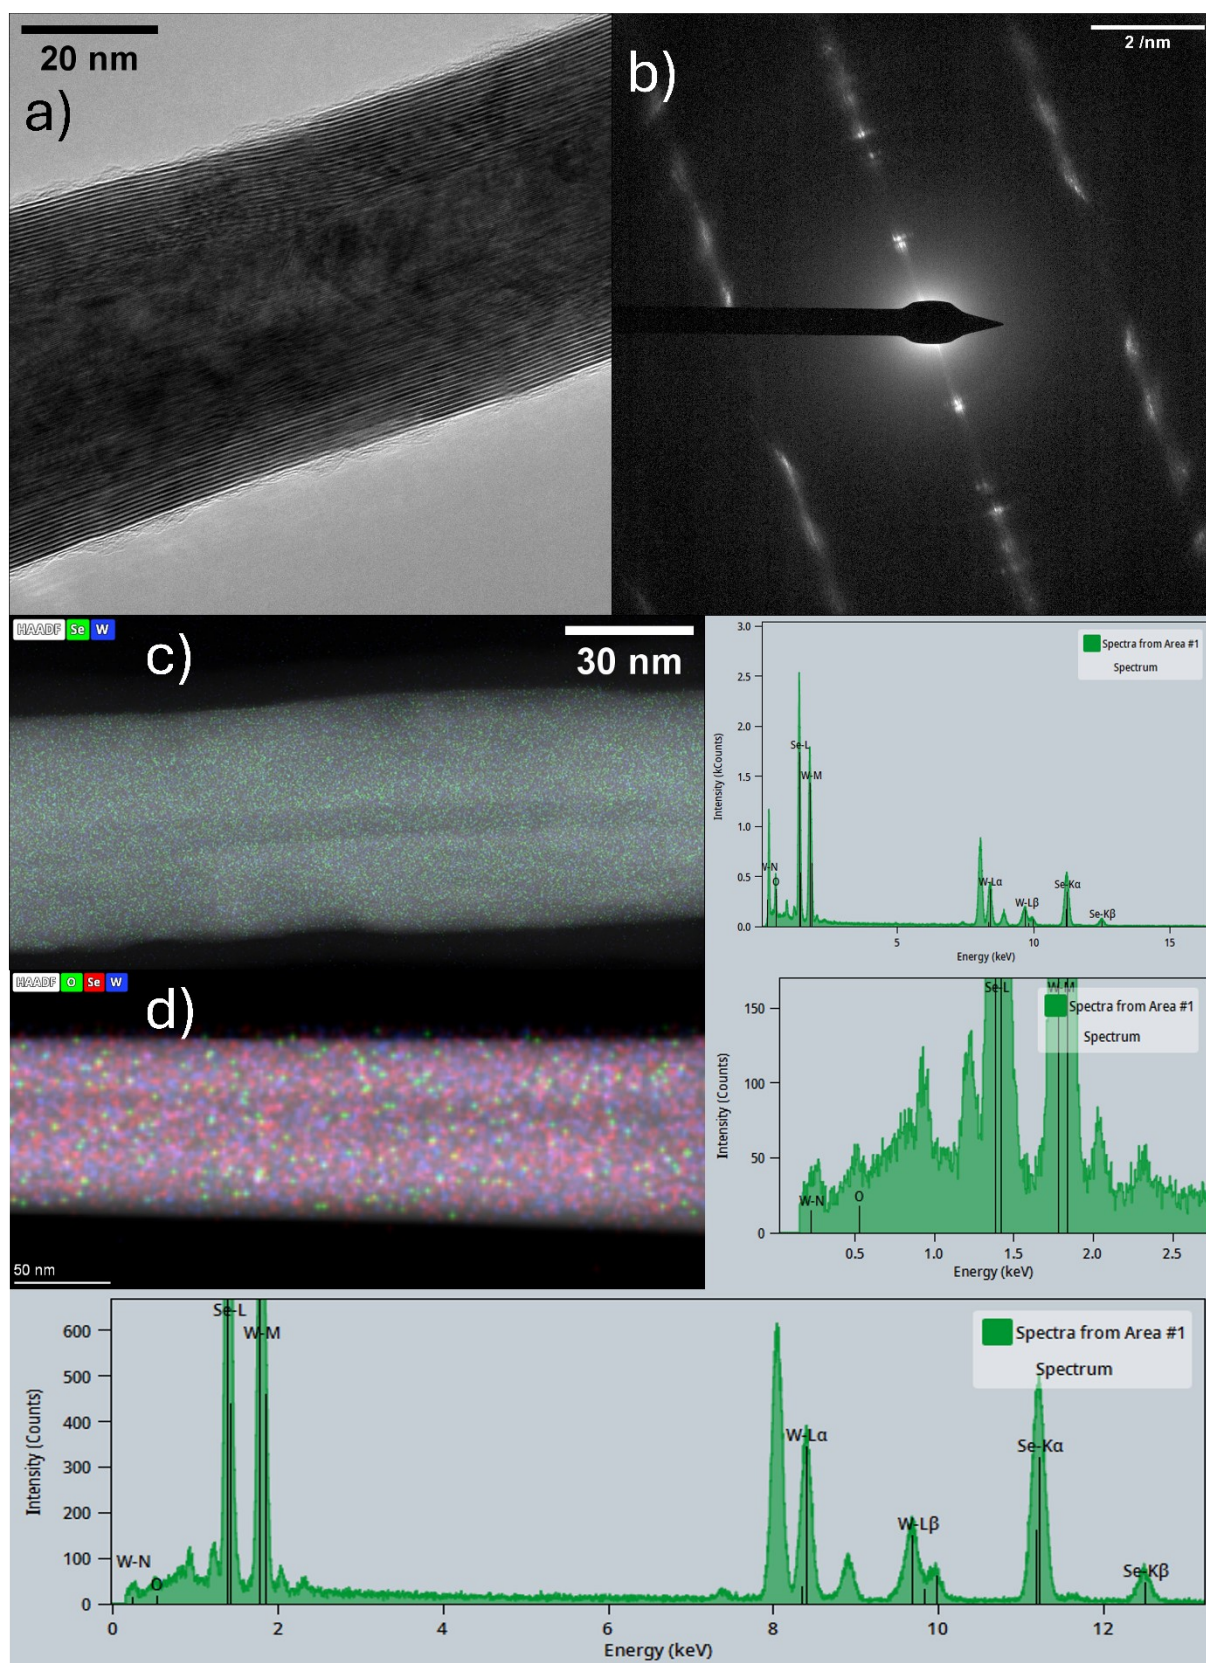

**Figure 2S.** a) TEM image of an ultra-long  $\text{WSe}_2$  NT; b) Electron diffraction of the NT. c) STEM-EDS mapping with tungsten and selenium uniformly distributed throughout the nanotube d) another  $\text{WSe}_2$  nanotube and its STEM-HAADF/EDS analysis focused primarily on oxygen content in the structure. The corresponding EDS spectra (expanded on the right and full spectrum at the bottom) show low oxygen content. Compared with c), where the high oxygen content arises primarily from the sample preparation and ambient contamination.

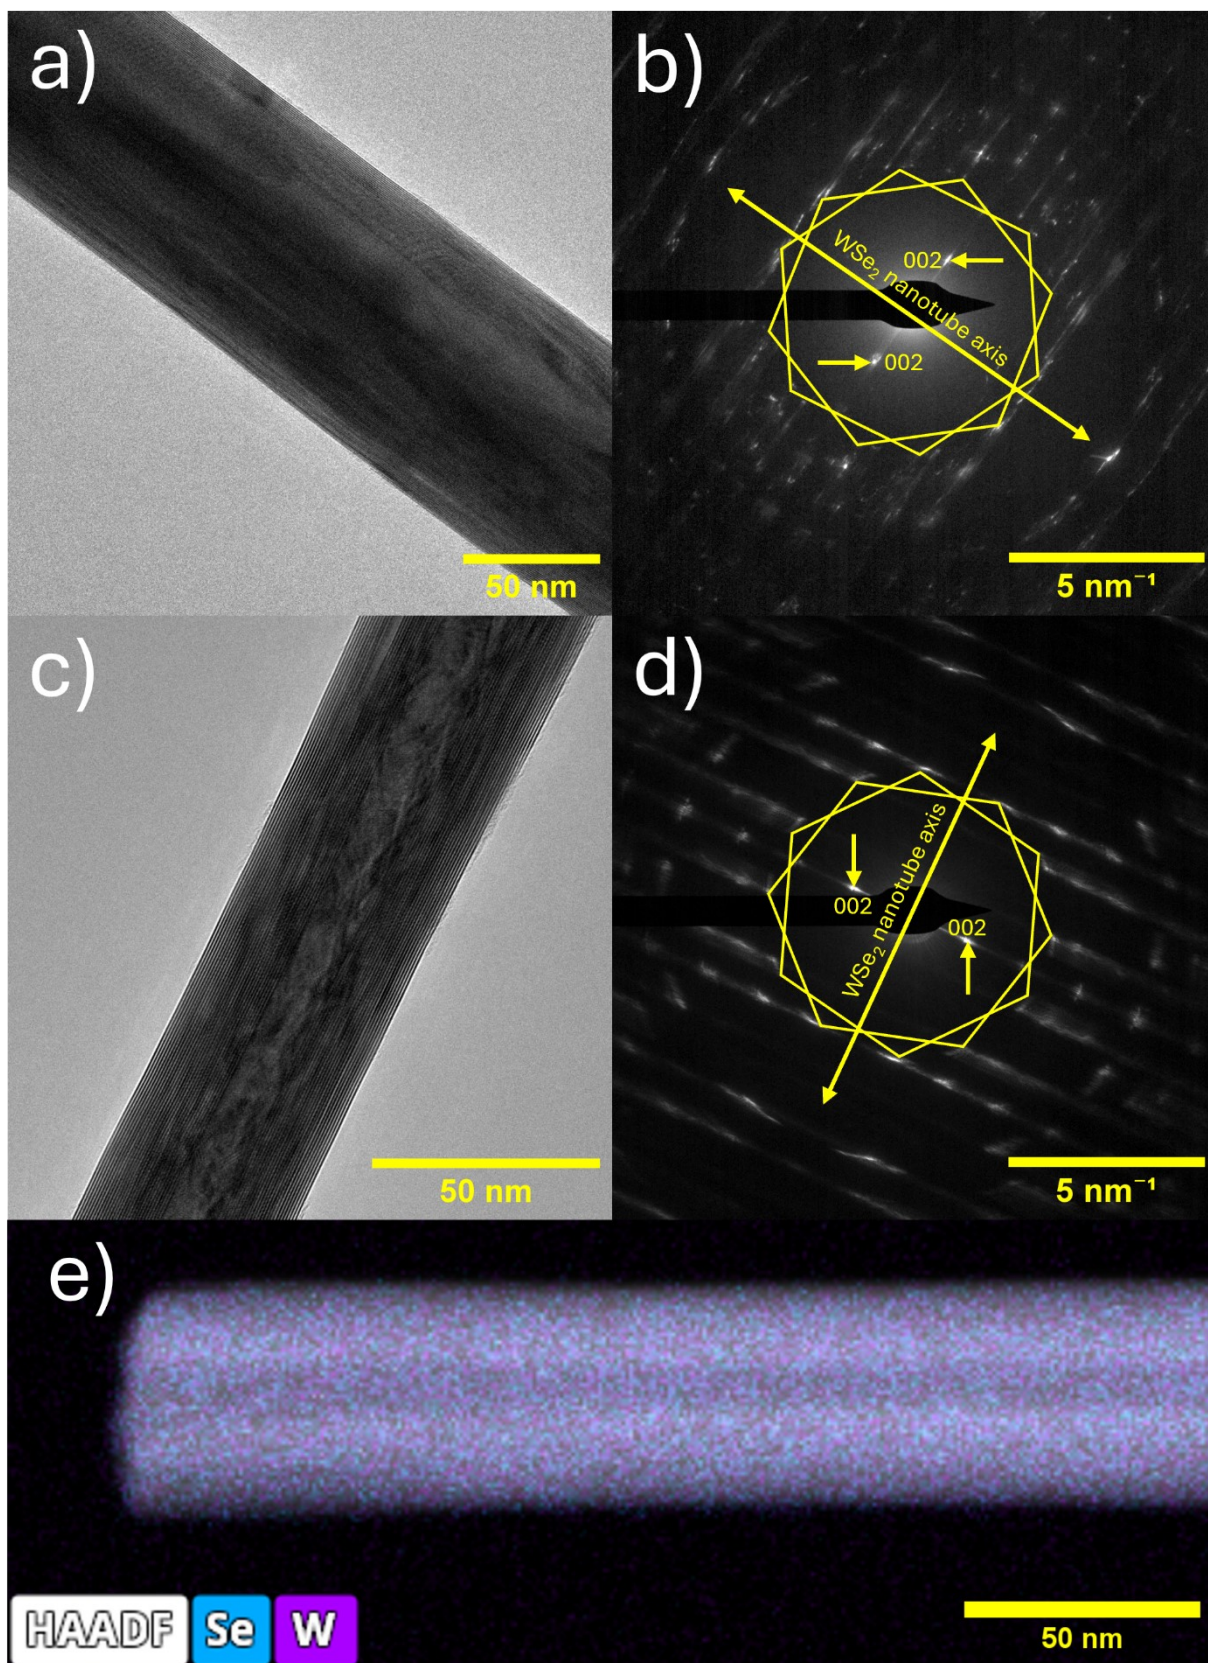

**Figure 3S.** TEM analysis of nanotubes of WSe<sub>2</sub>. a) and c) TEM images of two different nanotubes, b) and d) their diffraction. e) STEM-EDS analysis

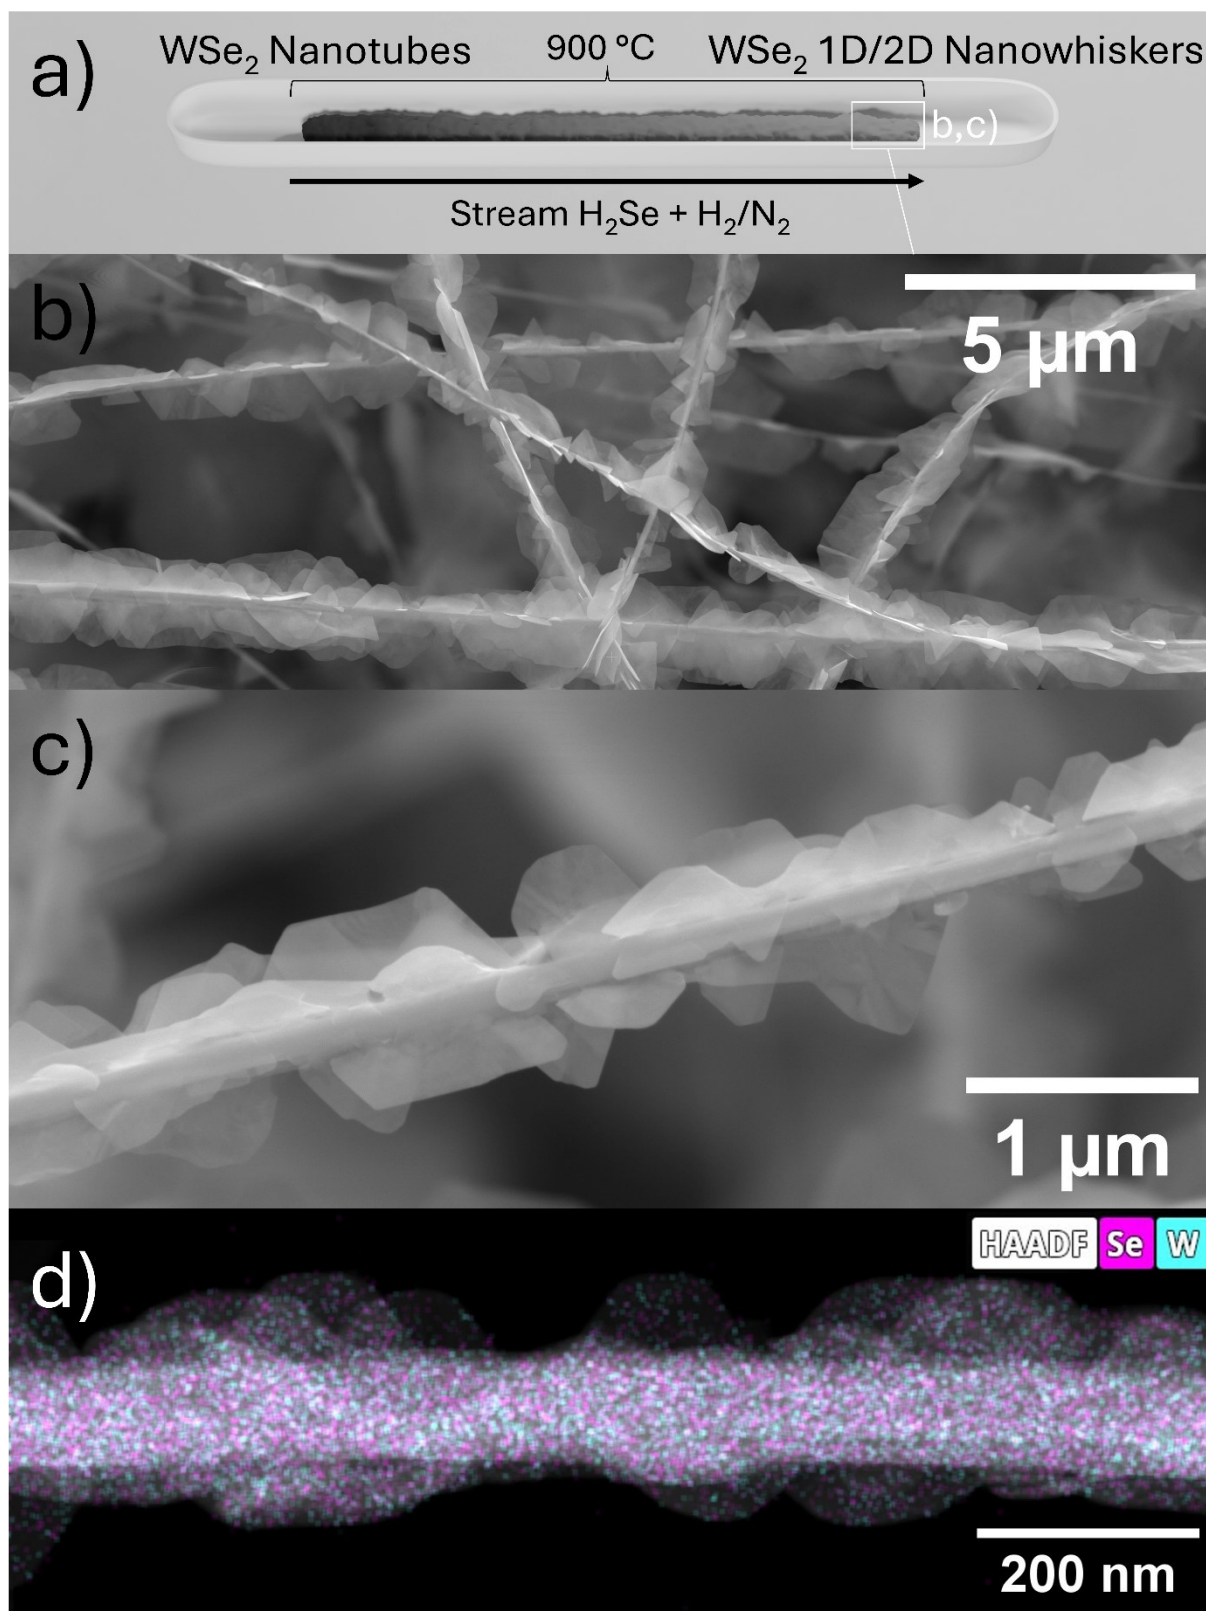

**Figure 4S.** Hybrid -tube/plates – scheme of synthesis- a); and a SEM image of such product in two magnifications- b& c. d) STEM-EDS analysis of the heterostructure showing the identical chemical composition of both plates and nanotube.

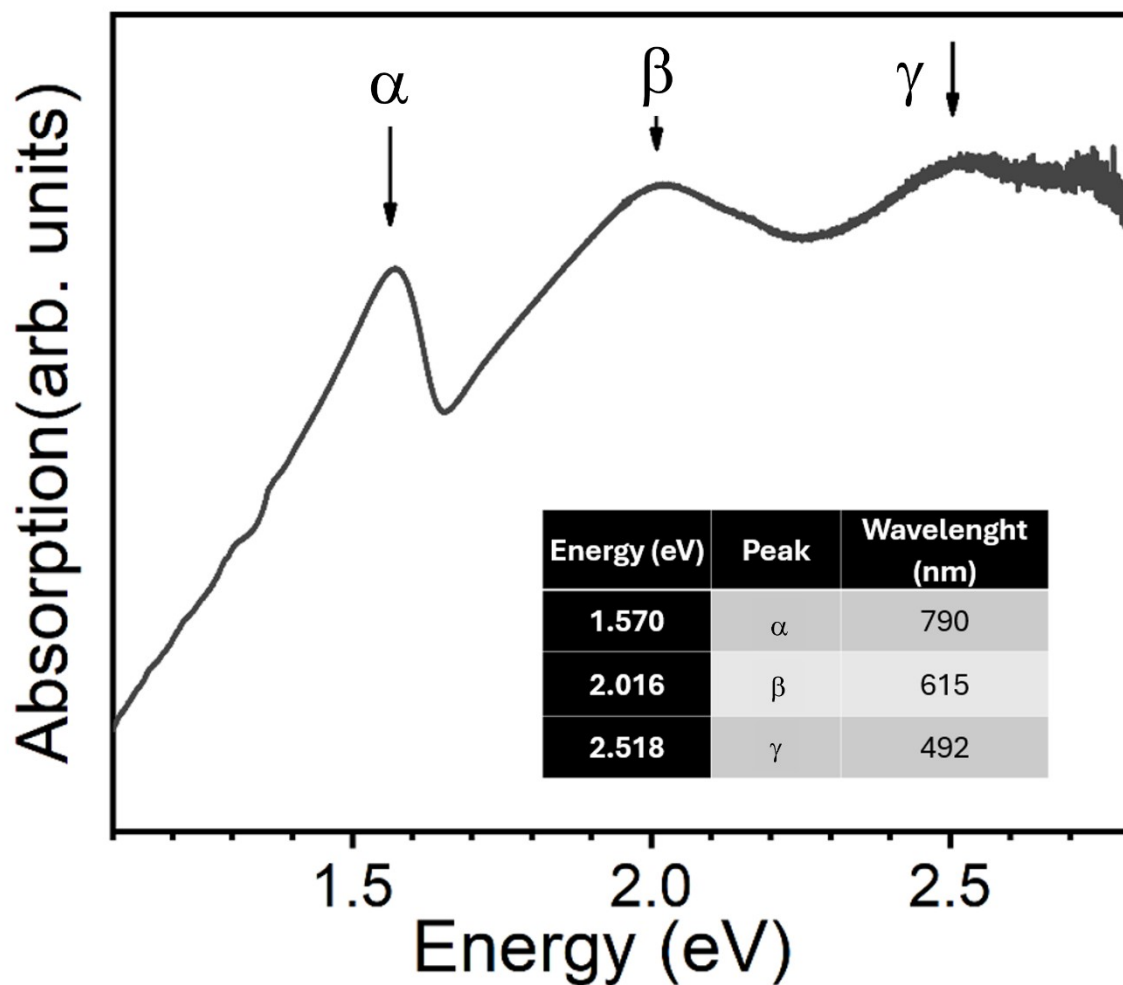

Figure 5S. Extinction measurements of an assortment of WSe<sub>2</sub> nanotubes dispersed in aqueous solution.

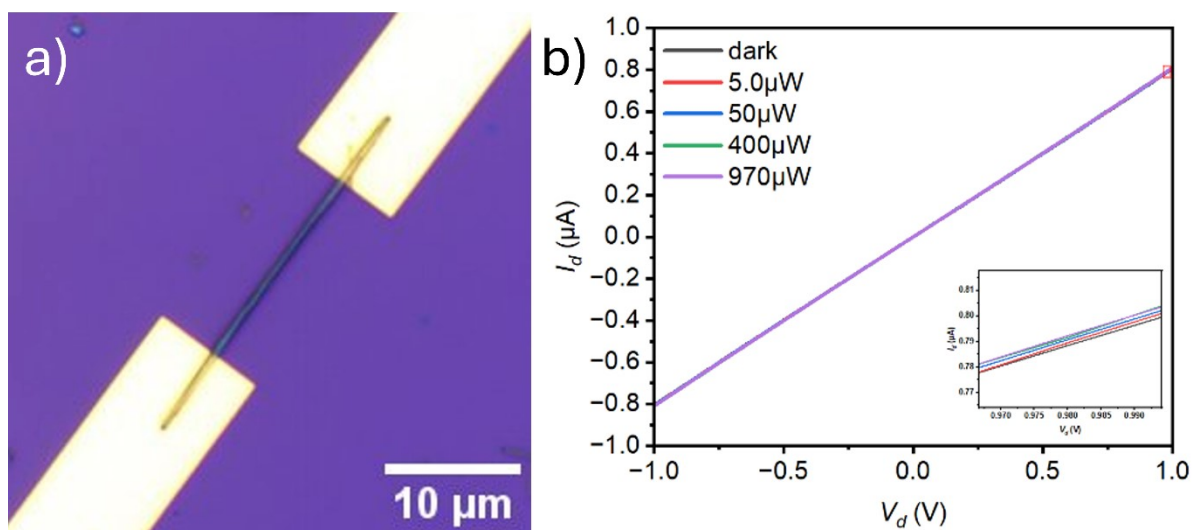

Figure 6S. Electrical transport measurements of individual W<sub>18</sub>O<sub>49</sub>@WSe<sub>2</sub> nanowhisker: a) SEM image of the 2-contact device with the laser spot on the center of the nanotube (channel); b) a typical I-V curve of the nanowhisker.
